# Supplementary material for: Identification of Novel Type III Secretion Chaperone-Substrate Complexes of Chlamydia trachomatis
Source: PubMed Central journal article supplement (PMC3576375; doi:10.1371/journal.pone.0056292), 2013-02-19
Supplement: pone.0056292.s002.pdf [file pone.0056292.s002.pdf]

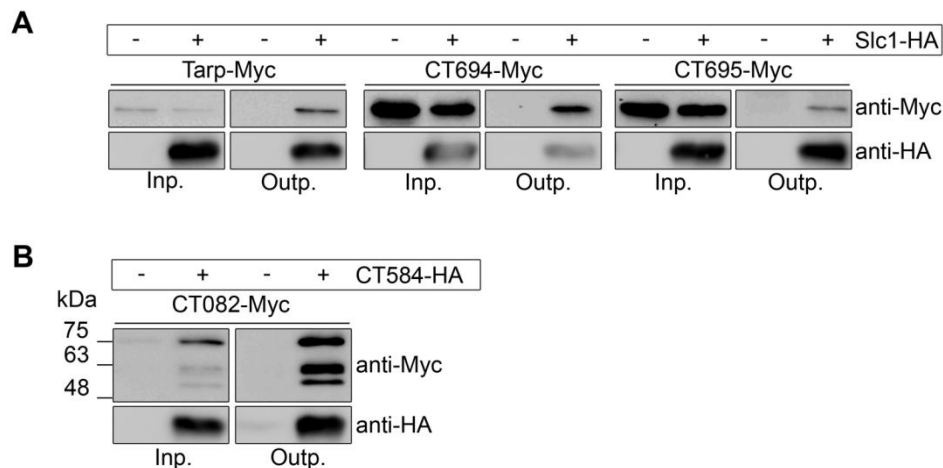

**Figure S2. Slc1 interacts with Tarp, CT694 and CT695 (A), and CT584 interacts with CT082 (B).** *Y. enterocolitica*  $\Delta$ HOPEMT strains expressing the indicated proteins were grown in T3S-inducing conditions (without  $Ca^{2+}$ ). The bacterial cells were lysed and proteins in the lysate supernatants (input) were immunoprecipitated with mouse monoclonal anti-HA antibodies bound to Protein G agarose beads (output). The input (Inp.) and output (Outp.) fractions from the immunoprecipitations (IPs) were analyzed by immunoblotting with rabbit polyclonal anti-Myc and rat monoclonal anti-HA antibodies.
