# Supplementary material for: Identification of Novel Type III Secretion Chaperone-Substrate Complexes of Chlamydia trachomatis
Source: PubMed Central journal article supplement (PMC3576375; doi:10.1371/journal.pone.0056292), 2013-02-19
Supplement: pone.0056292.s005.pdf [file pone.0056292.s005.pdf]

**Table S2. Primers used in this work.**

| <b>Code</b> | <b>Description</b>                            | <b><sup>a</sup>Sequence (5'-3')</b>       | <b>Restriction enzyme</b> |
|-------------|-----------------------------------------------|-------------------------------------------|---------------------------|
| 279         | Forward primer to construct pSVP15 and pSVP16 | GATCCTGCAGGTCCAGGCAGAATGCTG<br>AGG        | <i>Pst</i> I              |
| 280         | Reverse primer to construct pSVP15 and pSVP16 | GATCGGATCCTCTGCACGGATTCCTGC<br>TGGAG      | <i>Bam</i> HI             |
| 285         | Forward primer to construct pSVP17 and pSVP34 | GATCAAGCTTGACAACGTGGACTTTGA<br>ATCAC      | <i>Hind</i> III           |
| 286         | Reverse primer to construct pSVP17 and pSVP34 | GATCGGATCCTCAGGCTCTAGCTGATC<br>GGATTG     | <i>Bam</i> HI             |
| 331         | Forward primer to construct pSVP54 and pSVP55 | GATCGGATCCCTTAGATAATGAGTGGA<br>AAGC       | <i>Bam</i> HI             |
| 332         | Reverse primer to construct pSVP54 and pSVP55 | GATCGGTACCCGCATAACTAAGTAGTA<br>ATGC       | <i>Kpn</i> I              |
| 299         | Forward primer to construct pSVP24 and pSVP41 | GATCAAGCTTGACGACGAAACCCAAA<br>ACTCTAG     | <i>Hind</i> III           |
| 300         | Reverse primer to construct pSVP24 and pSVP41 | GATCGGATCCTCCACAGATTTTCGTTAA<br>TTCTTC    | <i>Bam</i> HI             |
| 333         | Forward primer to construct pSVP56            | GATCCTGCAGGGTTGGAAAAATTGATA<br>AAGAATTTTG | <i>Pst</i> I              |
| 334         | Forward primer to construct pSVP57            | GATCCTGCAGGTTGGAAAAATTGATAA<br>AGAATTTTG  | <i>Pst</i> I              |
| 335         | Reverse primer to construct pSVP56 and pSVP57 | GATCGGTACCCGCTCCTGCTCCGTTTTA<br>CTCAG     | <i>Kpn</i> I              |
| 315         | Forward primer to construct pSVP31 and pSVP46 | GATCAAGCTTGGATAAAGCAAAGATTAA<br>AATTAG    | <i>Hind</i> III           |
| 316         | Reverse primer to construct pSVP31 and pSVP46 | GATCGGATCCTCTTCTTCAGTTTGAATC<br>ACAG      | <i>Bam</i> HI             |
| 319         | Forward primer to construct pSVP33 and pSVP48 | GATCAAGCTTGAAGGAAGAAATTCTCG<br>CGC        | <i>Hind</i> III           |
| 320         | Reverse primer to construct pSVP33 and pSVP48 | GATCGGATCCTCATCCTTACAGAGGCT<br>CGTATCG    | <i>Bam</i> HI             |
| 354         | Forward primer to construct pSVP66            | GATCGGATCCCACGAATTCTATATCAG<br>GTGATC     | <i>Bam</i> HI             |
| 355         | Reverse primer to construct pSVP66            | GATCGGTACCCGTCCTACGGTATCAAT<br>CAGTGAGC   | <i>Kpn</i> I              |
| 367         | Forward primer to construct pSVP72            | GATCGGATCCCAGTATTCGACCTACTA<br>ATGG       | <i>Bam</i> HI             |
| 368         | Reverse primer to construct pSVP72            | GATCGGTACCCGGTCTAAGAAAACAGA<br>AGAAG      | <i>Kpn</i> I              |
| 369         | Forward primer to construct pSVP73            | GATCGGTACCGAGTAGCATAAGCCCTA<br>TAGG       | <i>Kpn</i> I              |
| 370         | Reverse primer to construct pSVP73            | GATCGGTACCCGGATATTCCCAACCGA<br>AGAAGG     | <i>Kpn</i> I              |
| 563         | Forward primer to construct pSVP119           | GATCGGTACCGTCAATTTCTGGAAGTG<br>GTAATGTATC | <i>Kpn</i> I              |
| 564         | Reverse primer to construct pSVP119           | GATCGAATTCGATGAATC<br>GCCGCTGCATCC        | <i>Eco</i> RI             |
| 359         | Forward primer to construct pSVP115           | GATCGGATCCCTCTTCTTACTATTTAAA<br>TTTTAGGC  | <i>Bam</i> HI             |
| 360         | Reverse primer to construct pSVP115           | GATCGAATTCGAATTAGAATAAATTTTC<br>CGCTGC    | <i>Eco</i> RI             |

**Table S2. Continued.**

| <b>Code</b> | <b>Description</b>                              | <b><sup>a</sup>Sequence (5'-3')</b>                                  | <b>Restriction enzyme</b> |
|-------------|-------------------------------------------------|----------------------------------------------------------------------|---------------------------|
| 361         | Forward primer to construct pSVP117             | GATCGGATCCCTGTTCTATGAACATAT<br>TTAATAAAAATTAAC                       | <i>Bam</i> HI             |
| 362         | Reverse primer to construct pSVP117             | GATCGGTACCCGACTAGCCAGTTTTCT<br>TGTTAAACC                             | <i>Kpn</i> I              |
| 363         | Forward primer to construct pSVP131 and pSVP75  | GATCGGATCCCAACCGTATTCATCGTA<br>CACAAGG                               | <i>Bam</i> HI             |
| 364         | Reverse primer to construct pSVP131 and pSVP75  | GATCGGTACCCGCTTAAGAGATTACG<br>CGC                                    | <i>Kpn</i> I              |
| 371         | Forward primer to construct pSVP136             | GATCGGATCCCTCAATACAACCTACAT<br>CCATTTT                               | <i>Bam</i> HI             |
| 372         | Reverse primer to construct pSVP136             | GATCGGTACCCGTTTAAATCTACGGAT<br>CAACTTAGC                             | <i>Kpn</i> I              |
| 373         | Forward primer to construct pSVP137             | GATCGGATCCCAGAAACCATCCGATTC<br>CAGAAGG                               | <i>Bam</i> HI             |
| 374         | Reverse primer to construct pSVP137             | GATCGAATTCGAGCTAGAAGCCAATGT<br>TCTATATAC                             | <i>Eco</i> RI             |
| 28          | Forward primer to construct pSVP138 and pSVP145 | GATTAAGTTGGGTAACGCC                                                  |                           |
| 55          | Reverse primer to construct pSVP138 and pFA17   | GATCCTCGAGTTAAGCATAATCAGGAA<br>CATCATACGGAT<br>ATGCACGGATTCTGCTGGAGG | <i>Xho</i> I              |
| 782         | Overlapping forward primer to construct pSVP138 | GGTTAAGTTGATATTTTATCTAACTATT<br>AGGAGATCAAATGTCCAGGCAGAATG<br>CTGAGG |                           |
| 783         | Overlapping reverse primer to construct pSVP138 | CCTCAGCATTCTGCCTGGACATTTGATC<br>TCCTAATAGTTAGATAAAATATCAACT<br>TAACC |                           |
| 5           | Forward primer to construct pSVP85 and pSVP186  | GATCTCATGACGAATTCTATATCAGGT<br>GATCAACCTACTG                         | <i>Bsp</i> HI             |
| 460         | Reverse primer to construct pSVP85 and pSVP187  | GATCGGTACCAGTCCTACGGTATCAAT<br>CAGTGAGC                              | <i>Kpn</i> I              |
| 461         | Forward primer to construct pSVP87 and pSVP190  | GATCTCATGAGTATTCGACCTACTAAT<br>GG                                    | <i>Bsp</i> HI             |
| 462         | Reverse primer to construct pSVP87 and pSVP197  | GATCGGTACCAGGTCTAAGAAAACAG<br>AAGAAG                                 | <i>Kpn</i> I              |
| 463         | Forward primer to construct pSVP88 and pSVP193  | GATCTCATGAGTAGCATAAGCCCTATA<br>GG                                    | <i>Bsp</i> HI             |
| 464         | Reverse primer to construct pSVP88 and pSVP194  | GATCGGTACCAGGATATTCCCAACCGA<br>AGAAGG                                | <i>Kpn</i> I              |
| 772         | Forward primer to construct pSVP141             | GATCTCATGAACCGTATTCATCGTAC                                           | <i>Bsp</i> HI             |
| 773         | Reverse primer to construct pSVP141             | GATCGGTACCAGTCTTAAGAGATTACG<br>CGCTAATCC                             | <i>Kpn</i> I              |
| 1060        | Reverse primer to construct pSVP186             | GATCGGTACCAGTCCAGCAACGGCTTG<br>GGAAG                                 | <i>Kpn</i> I              |
| 1061        | Forward primer to construct pSVP187             | GATCTCATGAAAATCACTTCTCCAGAT<br>AC                                    | <i>Bsp</i> HI             |
| 1064        | Reverse primer to construct pSVP190             | GATCGGTACCAGTTGTCCCTCCATAGA<br>ACCTAGC                               | <i>Kpn</i> I              |
| 1065        | Forward primer to construct pSVP197             | GATCTCATGAGTCCTCAAGATTATAAA<br>GC                                    | <i>Bsp</i> HI             |

**Table S2. Continued.**

| <b>Code</b> | <b>Description</b>                                                           | <b><sup>a</sup>Sequence (5'-3')</b>                                        | <b>Restriction enzyme</b> |
|-------------|------------------------------------------------------------------------------|----------------------------------------------------------------------------|---------------------------|
| 1068        | Reverse primer to construct pSVP193                                          | GATCGGT <u>ACCAGATTCCTTCGTGCAAC</u><br>ACGACG                              | <i>KpnI</i>               |
| 1069        | Forward primer to construct pSVP194                                          | GATCC <u>CATGGAAA</u> ACTATGATGTGAAA<br>AAAGC                              | <i>NcoI</i>               |
| 466         | Reverse primer to construct pSVP145 and pSVP82                               | GATCA <u>AGCTTAAGCATAATCAGGAACA</u><br>TCATACGGATACACAGATTCGTTAAT<br>TCTTC | <i>HindIII</i>            |
| 784         | Overlapping forward primer to construct pSVP145                              | GGTTAAGTTGATATTTTATCTAACTATT<br>AGGAGATCAAATGACGACGAAACCCA<br>AAACTCTAG    |                           |
| 785         | Overlapping reverse primer to construct pSVP145                              | CTAGAGTTTTGGGTTTCGTTCGTCAATTG<br>ATCTCCTAATAGTTAGATAAAAATATCA<br>ACTTAACC  |                           |
| 774         | Forward primer to construct pSVP142                                          | GATCT <u>CATGAGTATTTCTGGAAGTGGT</u><br>AATG                                | <i>BspHI</i>              |
| 775         | Reverse primer to construct pSVP142                                          | GATCGGT <u>ACCAGTGAATCGCCGCCTGC</u><br>ATCC                                | <i>KpnI</i>               |
| 796         | Forward primer to construct pCM24 and pSVP206                                | GATCC <u>GAAATTC</u> CCTCAATTTCTGGAAG<br>TGGTAATG                          | <i>EcoRI</i>              |
| 787         | Reverse primer to construct pCM24, pSVP200, pSVP201, pSVP202, pSVP206, pCM25 | GATC <u>GTCTGACTCATGAATCGCCGCCTG</u><br>CATCC                              | <i>SalI</i>               |
| 742         | Forward primer to construct pSVP182, pSVP183, pSVP184 and pSVP185            | GGGAATTCCATATG <u>TCCCCTATACTAG</u><br>GTTATTGG                            | <i>NdeI</i>               |
| 1072        | Reverse primer to construct pSVP182                                          | GATCGGT <u>ACCTCATCCTTTAGTACCTGC</u><br>ACGTAC                             | <i>KpnI</i>               |
| 755         | Reverse primer to construct pSVP183 and pSVP185                              | GATCGGT <u>ACCTCATGAATCGCCGCCTG</u><br>CATCC                               | <i>KpnI</i>               |
| 1073        | Overlapping forward primer to construct pSVP183                              | CGACTCGAGCGGCCGCATCGTTCCTTA<br>CAGGATTTGGAACG                              |                           |
| 1074        | Overlapping reverse primer to construct pSVP183                              | CGTTCCAAATCCTGTAAGGAACGATGC<br>GGCCGCTCGAGTCG                              |                           |
| 1075        | Reverse primer to construct pSVP184                                          | GATCGGT <u>ACCTCATGCAGTGATTTCTC</u><br>CAGATG                              | <i>KpnI</i>               |
| 1076        | Overlapping forward primer to construct pSVP185                              | CGACTCGAGCGGCCGCATCGTTAGCTT<br>CGTTTAATCCTAATGTTTCG                        |                           |
| 1077        | Overlapping reverse primer to construct pSVP185                              | CGAACATTAGGATTAACGAAGCTAAC<br>GATGCGGCCGCTCGAGTCG                          |                           |
| 1178        | Forward primer to construct pSVP200                                          | GATC <u>GAAATTC</u> CCCGATCCAGCTTCTGCA<br>GAAG                             | <i>EcoRI</i>              |
| 1179        | Forward primer to construct pSVP201 and pSVP203                              | GATC <u>GAAATTC</u> CCCAATTTCTGAACCT<br>AAGTTC                             | <i>EcoRI</i>              |
| 1180        | Forward primer to construct pSVP202                                          | GATC <u>GAAATTC</u> CCCCTTCCCATTTAGGG<br>ATGGC                             | <i>EcoRI</i>              |
| 1181        | Reverse primer to construct pSVP203                                          | GATC <u>CTCGAGTCAAACTGGTAAGCCG</u><br>AACTAACCG                            | <i>XhoI</i>               |
| 1190        | Overlapping forward primer to construct pSVP206                              | CCACTCCTAGTTCAGGCTCATTTCTTTC<br>CCATTTAGGGATGG                             |                           |
| 1191        | Overlapping reverse primer to construct pSVP206                              | CCATCCCTAAATGGGAAGGAAATGAGC<br>CTGAACCTAGGAGTGG                            |                           |

**Table S2. Continued.**

| <b>Code</b> | <b>Description</b>                  | <b><sup>a</sup>Sequence (5'-3')</b>                                         | <b>Restriction enzyme</b> |
|-------------|-------------------------------------|-----------------------------------------------------------------------------|---------------------------|
| 484         | Forward primer to construct pFA105  | GATCGGTACCATGGCAATTTCTGGAAG<br>TGGTAATG                                     | <i>EcoRI</i>              |
| 29          | Reverse primer to construct pFA105  | TTGTGTGGAATTGTGAGCG                                                         |                           |
| 650         | Forward primer to construct pSG13   | GAT <u>CCTCGAGCTT</u> CAATTTCTGGAAGT<br>GG                                  | <i>XhoI</i>               |
| 651         | Reverse primer to construct pSG13   | GATCGGAT <u>CCTCATGAATCGCCGCCTG</u><br>CATCC                                | <i>BamHI</i>              |
| 1098        | Forward primer to construct pSVP198 | GATCGGATCCACAATGGACACGAAACC<br>CAAAACTCTAGA                                 | <i>BamHI</i>              |
| 1099        | Reverse primer to construct pSVP198 | ATAAGAATGCGGCCGCTTAAGCATAAT<br>CAGGAACATCAT                                 | <i>NotI</i>               |
| 435         | Forward primer to construct pSVP90  | GAT <u>CTCATG</u> AAAATATCATCATTTATTT<br>CTACATCACTGC                       | <i>BspHI</i>              |
| 436         | Reverse primer to construct pSVP90  | GATCGGTAC <u>CAGCATCAATGACAGTAA</u><br>TTGC                                 | <i>KpnI</i>               |
| 54          | Forward primer to construct pFA17   | GATTTCCATATGTCCAGGCAGAATGCT<br>G                                            | <i>NdeI</i>               |
| 465         | Forward primer to construct pSVP82  | GGGAATTCCATATGACGACGAAACCCA<br>AAACTCTAG                                    | <i>NdeI</i>               |
| 467         | Forward primer to construct pSVP83  | GGGAATTCCATATGGATAAGCAAAGAT<br>TAAAATTAG                                    | <i>NdeI</i>               |
| 468         | Reverse primer to construct pSVP83  | GATCA <u>AGCTT</u> AAGCATAATCAGGAACA<br>TCATACGGATATTCTTCAGTTTGAATCA<br>CAG | <i>HindIII</i>            |
| 738         | Forward primer to construct pSVP147 | GATCGGATCCGACGACGAAACCCAAA<br>ACTC                                          | <i>BamHI</i>              |
| 739         | Reverse primer to construct pSVP147 | GATCA <u>AGCTT</u> CACAGATTTTCGTTAATT<br>CTTC                               | <i>HindIII</i>            |
| 786         | Forward primer to construct pCM25   | GATCCGAATTCTCAATTTCTGGAAGTG<br>GTAATG                                       | <i>EcoRI</i>              |

<sup>a</sup>Sites of restriction enzymes are underlined
